# Supplementary material for: Synthesis of two new copper-sandwiched polyoxotungstates and the influence of nuclear number on catalytic hydrogen evolution activity
Source: Royal Society of Chemistry journal article supplement (doi:10.1039/d0nj02065f), 2020-01-01
Supplement: d0nj02065f1.pdf [file d0nj02065f1.pdf]

## Supporting Information

### **Synthesis of two New Copper-Sandwiched Polyoxotungstates and their Catalytic Activity of Hydrogen Evolution Influenced by Nuclear Number**

Zhao-Min Su, Mo Zhang, Qingqing An, Dan Qin, Hai-Lou Li, Hongjin Lv, Zhiyu Jia\*, Qiang Zhang\* and Guo-Yu Yang\*

MOE Key Laboratory of Cluster Science, School of Chemistry and Chemical Engineering, Beijing Institute of Technology, Beijing 100081, China

E-Mail: [jzy@bit.edu.cn](mailto:jzy@bit.edu.cn), [zhangqiang6299@bit.edu.cn](mailto:zhangqiang6299@bit.edu.cn), [ygy@bit.edu.cn](mailto:ygy@bit.edu.cn)

**Table S1.** Crystallographic data and structure refinements for **1** and **2**.

|                                               | <b>1</b>                                                                                                                                                                                      | <b>2</b>                                                                                                                                                                                                             |
|-----------------------------------------------|-----------------------------------------------------------------------------------------------------------------------------------------------------------------------------------------------|----------------------------------------------------------------------------------------------------------------------------------------------------------------------------------------------------------------------|
| formula                                       | [Cu(dap) <sub>2</sub> ] <sub>2</sub> [{Cu <sub>8</sub> (dap) <sub>4</sub> (H <sub>2</sub> O) <sub>2</sub> }(SiW <sub>9</sub> O <sub>34</sub> ) <sub>2</sub> ] <sub>2</sub> ·7H <sub>2</sub> O | [Cu(dap) <sub>2</sub> (H <sub>2</sub> O)] <sub>2</sub> [Cu(dap) <sub>2</sub> ] <sub>2</sub> [{Cu <sub>6</sub> (dap) <sub>2</sub> }(SiW <sub>9</sub> O <sub>34</sub> ) <sub>2</sub> ] <sub>2</sub> ·8H <sub>2</sub> O |
| Formula weight                                | 5743.74                                                                                                                                                                                       | 5938.27                                                                                                                                                                                                              |
| crystal size[mm <sup>3</sup> ]                | 0.18×0.10×0.08                                                                                                                                                                                | 0.20×0.12×0.10                                                                                                                                                                                                       |
| Crystal color                                 | dark blue                                                                                                                                                                                     | dark green                                                                                                                                                                                                           |
| crystal system                                | monoclinic                                                                                                                                                                                    | triclinic                                                                                                                                                                                                            |
| space group                                   | P 21/c                                                                                                                                                                                        | P -1                                                                                                                                                                                                                 |
| a [Å]                                         | 13.6402(10)                                                                                                                                                                                   | 12.4480(5)                                                                                                                                                                                                           |
| b [Å]                                         | 31.703(2)                                                                                                                                                                                     | 14.3192(5)                                                                                                                                                                                                           |
| c [Å]                                         | 12.2361(9)                                                                                                                                                                                    | 17.1822(7)                                                                                                                                                                                                           |
| α [°]                                         | 90                                                                                                                                                                                            | 98.959(3)                                                                                                                                                                                                            |
| β [°]                                         | 114.901(2)                                                                                                                                                                                    | 110.639(4)                                                                                                                                                                                                           |
| γ [°]                                         | 90                                                                                                                                                                                            | 104.727(3)                                                                                                                                                                                                           |
| Volume [Å <sup>3</sup> ]                      | 4799.5(6)                                                                                                                                                                                     | 2668.2(2)                                                                                                                                                                                                            |
| Z                                             | 2                                                                                                                                                                                             | 1                                                                                                                                                                                                                    |
| Dcalc. [mg·m <sup>-3</sup> ]                  | 3.974                                                                                                                                                                                         | 3.696                                                                                                                                                                                                                |
| μ[mm <sup>-1</sup> ]                          | 32.365                                                                                                                                                                                        | 24.32                                                                                                                                                                                                                |
| <i>F</i> <sub>000</sub>                       | 5128.0                                                                                                                                                                                        | 2674.0                                                                                                                                                                                                               |
| θ range[°]                                    | 3.534 to 58.994                                                                                                                                                                               | 6.766 to 53                                                                                                                                                                                                          |
| Reflections collected                         | 63281                                                                                                                                                                                         | 22326                                                                                                                                                                                                                |
| Independent reflections                       | 13332                                                                                                                                                                                         | 11032                                                                                                                                                                                                                |
| <i>R</i> (int)                                | 0.0481                                                                                                                                                                                        | 0.0537                                                                                                                                                                                                               |
| Completeness                                  | 0.998                                                                                                                                                                                         | 0.997                                                                                                                                                                                                                |
| Data/restraints/parameters                    | 13332/51/641                                                                                                                                                                                  | 11032/132/702                                                                                                                                                                                                        |
| Goodness-of-fit on <i>F</i> <sup>2</sup>      | 1.209                                                                                                                                                                                         | 1.067                                                                                                                                                                                                                |
| Final <i>R</i> indices [I>2σ(I)]              | <i>R</i> <sub>1</sub> = 0.0466, <i>wR</i> <sub>2</sub> = 0.0927                                                                                                                               | <i>R</i> <sub>1</sub> = 0.0425, <i>wR</i> <sub>2</sub> = 0.0942                                                                                                                                                      |
| <i>R</i> indices (all data)                   | <i>R</i> <sub>1</sub> = 0.0584, <i>wR</i> <sub>2</sub> = 0.0965                                                                                                                               | <i>R</i> <sub>1</sub> = 0.0594, <i>wR</i> <sub>2</sub> = 0.1052                                                                                                                                                      |
| Largest diff. peak and hole/e.Å <sup>-3</sup> | 2.32/-3.19                                                                                                                                                                                    | 4.45/-3.62                                                                                                                                                                                                           |

**Table S2.** Bond valence sum (BVS) calculations of all Cu and W atoms in **1** and **2**.

| <b>1-BVS</b> |      | <b>2-BVS</b> |      |
|--------------|------|--------------|------|
| Cu1          | 2.11 | Cu1          | 2.16 |
| Cu2          | 2.12 | Cu2          | 2.17 |

|     |      |     |      |
|-----|------|-----|------|
| Cu3 | 2.00 | Cu3 | 2.19 |
| Cu4 | 2.15 | Cu4 | 2.24 |
| Cu5 | 2.14 | Cu5 | 2.47 |
| W1  | 6.19 | Cu6 | 2.01 |
| W2  | 6.05 | W1  | 6.24 |
| W3  | 6.20 | W2  | 6.28 |
| W4  | 6.14 | W3  | 6.09 |
| W5  | 6.19 | W4  | 6.13 |
| W6  | 6.10 | W5  | 6.23 |
| W7  | 6.01 | W6  | 6.13 |
| W8  | 6.09 | W7  | 6.10 |
| W9  | 6.08 | W8  | 6.20 |
|     |      | W9  | 5.99 |

**Table S3.** Quantum yields of H<sub>2</sub> production for **1** and **2** under different conditions in 10 hours.

| QY (%)            |                                                                                        |                                                           |       |       |
|-------------------|----------------------------------------------------------------------------------------|-----------------------------------------------------------|-------|-------|
| Compound <b>1</b> | [Ir(ppy) <sub>2</sub> (dtbbpy)][PF <sub>6</sub> ] (0.2 mM)<br>TEOA (0.25 M)            | Catalyst <b>1</b> (mg)                                    | 1     | 0.016 |
|                   |                                                                                        |                                                           | 2     | 0.051 |
|                   |                                                                                        |                                                           | 4     | 0.093 |
|                   | Catalyst <b>1</b> (2 mg)<br>TEOA (0.25 M)                                              | [Ir(ppy) <sub>2</sub> (dtbbpy)][PF <sub>6</sub> ]<br>(mM) | 0.1   | 0.021 |
|                   |                                                                                        |                                                           | 0.4   | 0.057 |
|                   | Catalyst <b>1</b> (2 mg)<br>[Ir(ppy) <sub>2</sub> (dtbbpy)][PF <sub>6</sub> ] (0.2 mM) | TEOA (M)                                                  | 0.05  | 0.022 |
| 0.15              |                                                                                        |                                                           | 0.035 |       |
| Compound <b>2</b> | [Ir(ppy) <sub>2</sub> (dtbbpy)][PF <sub>6</sub> ] (0.2 mM)<br>TEOA (0.25 M)            | Catalyst <b>2</b> (mg)                                    | 1     | 0.028 |
|                   |                                                                                        |                                                           | 2     | 0.036 |
|                   |                                                                                        |                                                           | 4     | 0.083 |
|                   | Catalyst <b>2</b> (2mg)<br>TEOA (0.25 M)                                               | [Ir(ppy) <sub>2</sub> (dtbbpy)][PF <sub>6</sub> ]<br>(mM) | 0.1   | 0.011 |
|                   |                                                                                        |                                                           | 0.4   | 0.053 |
|                   | Catalyst <b>2</b> (2mg)<br>[Ir(ppy) <sub>2</sub> (dtbbpy)][PF <sub>6</sub> ] (0.2 mM)  | TEOA(M)                                                   | 0.05  | 0.015 |
| 0.15              |                                                                                        |                                                           | 0.025 |       |

**Table S4.** Elemental analysis for **1** and **2**.

| Elemental analysis |   | calcd (%) | Found (%) |
|--------------------|---|-----------|-----------|
| Compound <b>1</b>  | C | 5.11      | 5.35      |
|                    | N | 3.97      | 4.21      |
| Compound <b>2</b>  | C | 6.16      | 5.82      |
|                    | N | 4.79      | 4.75      |

**Table S5.** Major bond lengths and bond angles for POM **1** and **2**.

| <b>1</b>         |                     | <b>2</b>         |                         |
|------------------|---------------------|------------------|-------------------------|
| Bond lengths (Å) |                     | Bond lengths (Å) |                         |
| Cu1-N            | 1.965(13)-1.971(11) | Cu1-O            | 1.922(7)-2.318(6)       |
| Cu1-O            | 1.976(8)-2.427(8)   | Cu2-O            | 1.920(7)-2.300(7)       |
| Cu2-O            | 1.939(8)-2.437(11)  | Cu3-N            | 1.960(9)-1.969(9)       |
| Cu3-N            | 1.983(15)-2.029(14) | Cu3-O            | 1.991(7)-2.339(7)       |
| Cu3-O            | 1.993(8)-2.359(8)   | Cu4-N            | 1.979(11)-<br>2.016(12) |
| Cu4-O            | 1.953(7)-2.358(7)   | Cu4-O            | 2.489 (4)-2.583 (3)     |
| Cu5-N            | 1.972(18)-2.022(18) | Cu5-N            | 1.89(2)-1.997(19)       |
| Si1-O            | 1.620(8)- 1.642(8)  | Cu5-O            | 3.137(2)-3.147(3)       |
| W1-O             | 1.721(8)- 2.381(7)  | Cu6-N            | 2.007(11)-<br>2.015(12) |
| W2-O             | 1.707(9)-2.425(7)   | Cu6-O            | 3.232(6)                |
| W3-O             | 1.708(9)- 2.386(7)  | Si1-O            | 1.625(7)-1.635(7)       |
| W4-O             | 1.725(8)-2.348(7)   | W1-O             | 1.705(8)-2.391(7)       |
| W5-O             | 1.706(8)-2.373(7)   | W2-O             | 1.713(7)-2.391(7)       |
| W6-O             | 1.727(9)-2.289(7)   | W3-O             | 1.728(8)- 2.410(7)      |
| W7-O             | 1.724(9)-2.368(7)   | W4-O             | 1.718(7)-2.363(6)       |
| W8-O             | 1.725(9)- 2.355(7)  | W5-O             | 1.715(7)-2.306(7)       |
| W9-O             | 1.710(8)-2.316(7)   | W6-O             | 1.715(7)-2.376(7)       |
|                  |                     | W7-O             | 1.715(7)-2.420(7)       |
|                  |                     | W8-O             | 1.718(7)-2.285(7)       |
|                  |                     | W9-O             | 1.730(7)-2.351(6)       |
| Bond angles(°)   |                     | Bond angles(°)   |                         |
| N-Cu1-N          | 84.3(6)             | O-Cu1-O          | 75.0(3)-87.3(3)         |
| N-Cu1-O          | 91.6(5)-174.2(5)    | O-Cu2-O          | 83.1(3)-176.2(3)        |
| O-Cu1-O          | 72.6(3)-90.6(3)     | N-Cu3-N          | 84.2(2)                 |
| O-Cu2-O          | 84.8(3)-173.6(4)    | N-Cu3-O          | 91.9(0)-171.0(2)        |
| N-Cu3-N          | 85.9(6)             | O-Cu3-O          | 85.4(3)-175.6(3)        |
| N-Cu3-O          | 89.3(5) -168.6(5)   | N-Cu4-N          | 83.7(6)-178.3(5)        |
| O-Cu3-O          | 75.5(3)-86.7(3)     | N-Cu4-O          | 87.2(2)-95.8(1)         |
| O-Cu4-O          | 83.4(3)-176.1(3)    | O-Cu4-O          | 175.5(8)                |
| N-Cu5-N          | 82.3(7)-176.7(7)    | N-Cu5-N          | 85.7(8)-180.0           |
| N-Cu5-O          | 77.9(8)-100.3(8)    | N-Cu5-O          | 66.7(4)-113.2(6)        |

|         |                   |         |                    |
|---------|-------------------|---------|--------------------|
| O-Cu5-O | 173.0(0)          | O-Cu5-O | 180.0              |
| O-Si1-O | 107.6(4)-112.6(4) | N-Cu6-O | 79.6(5)-100.3(4)   |
| O-W1-O  | 73.1(3)-170.3(4)  | O-Cu6-O | 180.0              |
| O-W2-O  | 72.5(3)-172.1(4)  | O-Si1-O | 107.8(4)- 111.4(4) |
| O-W3-O  | 74.9(3)-170.9(4)  | O-W1-O  | 72.4(3)-169.2(3)   |
| O-W4-O  | 72.6(3)-167.6(4)  | O-W2-O  | 73.1(3) -172.0(3)  |
| O-W5-O  | 73.0(3)-168.4(4)  | O-W3-O  | 73.1(3)-171.2(3)   |
| O-W6-O  | 74.0(3)-170.7(4)  | O-W4-O  | 74.6(3)-172.8(3)   |
| O-W7-O  | 74.1(3)-173.3(4)  | O-W5-O  | 73.6(3)- 169.7(3)  |
| O-W8-O  | 74.4(3)-170.0(4)  | O-W6-O  | 71.8(3)-166.9(3)   |
| O-W9-O  | 73.7(3)-169.7(4)  | O-W7-O  | 71.3(3)-167.3(3)   |
|         |                   | O-W8-O  | 72.7(3)-168.4(3)   |
|         |                   | O-W9-O  | 72.8(3)- 166.9(3)  |

### The description for the DFT computational model.

The atomic valence electronic configuration considered as H:  $1s^1$ , C:  $2s^22p^2$ , N:  $2s^22p^3$ , O:  $2s^22p^4$ , Si:  $3s^23p^2$ , Cu:  $3d^{10}4s^1$  and W:  $5d^46s^2$ .

Model: A single molecule of **1** and **2** is placed in a box with  $25 \times 25 \times 25$  Å to avoid periodic interactions. To meet the experimental configuration, the experimental structure of **1** and **2** were employed to investigate the electronic structure rather than the geometric optimization by DFT. The total system is net neutral.

The charge, spin and fractional coordination (including the information of crystal lattice) are shown in Table S6-S11.

**Table S6.** The charge of **1**.

| Atom | s     | p     | d | total |
|------|-------|-------|---|-------|
| 1C   | 0.873 | 1.572 | 0 | 2.445 |
| 2C   | 0.843 | 1.797 | 0 | 2.64  |
| 3C   | 0.86  | 1.567 | 0 | 2.426 |
| 4C   | 0.854 | 1.56  | 0 | 2.414 |
| 5C   | 0.844 | 1.615 | 0 | 2.458 |
| 6C   | 0.844 | 1.749 | 0 | 2.593 |
| 7C   | 0.873 | 1.572 | 0 | 2.445 |
| 8C   | 0.843 | 1.797 | 0 | 2.64  |
| 9C   | 0.859 | 1.567 | 0 | 2.426 |

|     |       |       |   |       |
|-----|-------|-------|---|-------|
| 10C | 0.853 | 1.561 | 0 | 2.414 |
| 11C | 0.844 | 1.615 | 0 | 2.459 |
| 12C | 0.844 | 1.75  | 0 | 2.594 |
| 13N | 1.273 | 2.377 | 0 | 3.65  |
| 14N | 1.314 | 2.193 | 0 | 3.507 |
| 15N | 1.318 | 2.167 | 0 | 3.485 |
| 16N | 1.285 | 2.263 | 0 | 3.547 |
| 17N | 1.273 | 2.376 | 0 | 3.649 |
| 18N | 1.314 | 2.194 | 0 | 3.508 |
| 19N | 1.318 | 2.166 | 0 | 3.484 |
| 20N | 1.284 | 2.263 | 0 | 3.548 |
| 21O | 1.586 | 3.566 | 0 | 5.152 |
| 22O | 1.602 | 3.491 | 0 | 5.093 |
| 23O | 1.597 | 3.452 | 0 | 5.049 |
| 24O | 1.581 | 3.6   | 0 | 5.18  |
| 25O | 1.598 | 3.463 | 0 | 5.062 |
| 26O | 1.582 | 3.608 | 0 | 5.19  |
| 27O | 1.595 | 3.623 | 0 | 5.218 |
| 28O | 1.597 | 3.503 | 0 | 5.1   |
| 29O | 1.601 | 3.482 | 0 | 5.084 |
| 30O | 1.597 | 3.526 | 0 | 5.123 |
| 31O | 1.595 | 3.518 | 0 | 5.113 |
| 32O | 1.603 | 3.488 | 0 | 5.091 |
| 33O | 1.602 | 3.486 | 0 | 5.088 |
| 34O | 1.596 | 3.458 | 0 | 5.055 |
| 35O | 1.601 | 3.489 | 0 | 5.09  |
| 36O | 1.607 | 3.444 | 0 | 5.051 |
| 37O | 1.603 | 3.477 | 0 | 5.08  |
| 38O | 1.6   | 3.457 | 0 | 5.056 |
| 39O | 1.594 | 3.52  | 0 | 5.115 |
| 40O | 1.602 | 3.485 | 0 | 5.087 |
| 41O | 1.601 | 3.491 | 0 | 5.093 |
| 42O | 1.58  | 3.603 | 0 | 5.183 |
| 43O | 1.595 | 3.603 | 0 | 5.198 |
| 44O | 1.599 | 3.472 | 0 | 5.071 |
| 45O | 1.593 | 3.626 | 0 | 5.219 |
| 46O | 1.605 | 3.484 | 0 | 5.089 |
| 47O | 1.589 | 3.651 | 0 | 5.24  |
| 48O | 1.595 | 3.627 | 0 | 5.221 |
| 49O | 1.598 | 3.617 | 0 | 5.215 |
| 50O | 1.595 | 3.512 | 0 | 5.107 |
| 51O | 1.596 | 3.514 | 0 | 5.11  |
| 52O | 1.584 | 3.674 | 0 | 5.258 |

|      |       |       |       |       |
|------|-------|-------|-------|-------|
| 53O  | 1.591 | 3.651 | 0     | 5.242 |
| 54O  | 1.619 | 3.416 | 0     | 5.035 |
| 55O  | 1.586 | 3.566 | 0     | 5.151 |
| 56O  | 1.603 | 3.486 | 0     | 5.089 |
| 57O  | 1.596 | 3.452 | 0     | 5.049 |
| 58O  | 1.581 | 3.599 | 0     | 5.18  |
| 59O  | 1.598 | 3.464 | 0     | 5.062 |
| 60O  | 1.583 | 3.608 | 0     | 5.191 |
| 61O  | 1.595 | 3.622 | 0     | 5.216 |
| 62O  | 1.596 | 3.515 | 0     | 5.111 |
| 63O  | 1.601 | 3.482 | 0     | 5.084 |
| 64O  | 1.597 | 3.518 | 0     | 5.116 |
| 65O  | 1.595 | 3.518 | 0     | 5.113 |
| 66O  | 1.603 | 3.489 | 0     | 5.092 |
| 67O  | 1.603 | 3.484 | 0     | 5.087 |
| 68O  | 1.597 | 3.456 | 0     | 5.053 |
| 69O  | 1.601 | 3.489 | 0     | 5.09  |
| 70O  | 1.607 | 3.443 | 0     | 5.05  |
| 71O  | 1.603 | 3.477 | 0     | 5.08  |
| 72O  | 1.599 | 3.458 | 0     | 5.057 |
| 73O  | 1.595 | 3.52  | 0     | 5.114 |
| 74O  | 1.601 | 3.484 | 0     | 5.085 |
| 75O  | 1.603 | 3.491 | 0     | 5.094 |
| 76O  | 1.58  | 3.602 | 0     | 5.182 |
| 77O  | 1.595 | 3.603 | 0     | 5.198 |
| 78O  | 1.599 | 3.472 | 0     | 5.071 |
| 79O  | 1.593 | 3.626 | 0     | 5.219 |
| 80O  | 1.604 | 3.486 | 0     | 5.09  |
| 81O  | 1.586 | 3.656 | 0     | 5.242 |
| 82O  | 1.594 | 3.629 | 0     | 5.223 |
| 83O  | 1.598 | 3.616 | 0     | 5.214 |
| 84O  | 1.595 | 3.513 | 0     | 5.108 |
| 85O  | 1.596 | 3.511 | 0     | 5.107 |
| 86O  | 1.585 | 3.673 | 0     | 5.258 |
| 87O  | 1.589 | 3.655 | 0     | 5.245 |
| 88O  | 1.619 | 3.417 | 0     | 5.035 |
| 89Si | 0.672 | 1.011 | 0     | 1.682 |
| 90Si | 0.672 | 1.011 | 0     | 1.682 |
| 91Cu | 0.324 | 0.37  | 9.212 | 9.906 |
| 92Cu | 0.325 | 0.343 | 9.256 | 9.924 |
| 93Cu | 0.4   | 0.396 | 9.145 | 9.941 |
| 94Cu | 0.351 | 0.35  | 9.196 | 9.897 |
| 95Cu | 0.324 | 0.37  | 9.213 | 9.907 |

|      |       |       |       |       |
|------|-------|-------|-------|-------|
| 96Cu | 0.325 | 0.343 | 9.257 | 9.925 |
| 97Cu | 0.399 | 0.396 | 9.146 | 9.941 |
| 98Cu | 0.351 | 0.35  | 9.196 | 9.897 |
| 99W  | 0.749 | 1.067 | 4.313 | 6.129 |
| 100W | 0.755 | 1.077 | 4.342 | 6.174 |
| 101W | 0.749 | 1.071 | 4.319 | 6.138 |
| 102W | 0.753 | 1.101 | 4.347 | 6.201 |
| 103W | 0.742 | 1.069 | 4.342 | 6.152 |
| 104W | 0.748 | 1.08  | 4.313 | 6.142 |
| 105W | 0.746 | 1.085 | 4.329 | 6.16  |
| 106W | 0.752 | 1.069 | 4.352 | 6.173 |
| 107W | 0.761 | 1.07  | 4.416 | 6.247 |
| 108W | 0.748 | 1.066 | 4.321 | 6.135 |
| 109W | 0.755 | 1.078 | 4.341 | 6.174 |
| 110W | 0.748 | 1.068 | 4.328 | 6.144 |
| 111W | 0.749 | 1.102 | 4.334 | 6.185 |
| 112W | 0.741 | 1.072 | 4.328 | 6.141 |
| 113W | 0.748 | 1.081 | 4.311 | 6.141 |
| 114W | 0.748 | 1.083 | 4.349 | 6.179 |
| 115W | 0.753 | 1.071 | 4.344 | 6.168 |
| 116W | 0.761 | 1.07  | 4.415 | 6.246 |
| 117H | 0.643 | 0.041 | 0     | 0.684 |
| 118H | 0.639 | 0.041 | 0     | 0.681 |
| 119H | 0.637 | 0.042 | 0     | 0.68  |
| 120H | 0.645 | 0.044 | 0     | 0.688 |
| 121H | 0.641 | 0.041 | 0     | 0.682 |
| 122H | 0.645 | 0.042 | 0     | 0.686 |
| 123H | 0.637 | 0.042 | 0     | 0.68  |
| 124H | 0.639 | 0.041 | 0     | 0.681 |
| 125H | 0.643 | 0.041 | 0     | 0.684 |
| 126H | 0.645 | 0.042 | 0     | 0.687 |
| 127H | 0.641 | 0.041 | 0     | 0.682 |
| 128H | 0.645 | 0.044 | 0     | 0.689 |
| 129H | 0.564 | 0.106 | 0     | 0.67  |
| 130H | 0.524 | 0.093 | 0     | 0.618 |
| 131H | 0.594 | 0.114 | 0     | 0.709 |
| 132H | 0.554 | 0.103 | 0     | 0.657 |
| 133H | 0.542 | 0.099 | 0     | 0.641 |
| 134H | 0.592 | 0.117 | 0     | 0.709 |
| 135H | 0.592 | 0.111 | 0     | 0.703 |
| 136H | 0.63  | 0.074 | 0     | 0.704 |
| 137H | 0.563 | 0.105 | 0     | 0.668 |
| 138H | 0.524 | 0.093 | 0     | 0.618 |



|      |       |       |   |       |
|------|-------|-------|---|-------|
| 139H | 0.561 | 0.106 | 0 | 0.667 |
| 140H | 0.597 | 0.116 | 0 | 0.712 |
| 141H | 0.554 | 0.104 | 0 | 0.658 |
| 142H | 0.542 | 0.098 | 0 | 0.64  |
| 143H | 0.593 | 0.117 | 0 | 0.709 |
| 144H | 0.591 | 0.113 | 0 | 0.704 |
| 145H | 0.631 | 0.075 | 0 | 0.705 |
| 146H | 0.561 | 0.106 | 0 | 0.667 |
| 147H | 0.632 | 0.045 | 0 | 0.678 |
| 148H | 0.636 | 0.043 | 0 | 0.679 |
| 149H | 0.633 | 0.046 | 0 | 0.678 |
| 150H | 0.636 | 0.043 | 0 | 0.68  |

**Table S7.** The magnetic configuration (spin) of **1**.

| Atom | s      | p      | d | total  |
|------|--------|--------|---|--------|
| 1C   | 0.001  | -0.003 | 0 | -0.002 |
| 2C   | 0      | -0.002 | 0 | -0.002 |
| 3C   | 0.01   | 0.065  | 0 | 0.075  |
| 4C   | 0.001  | -0.018 | 0 | -0.017 |
| 5C   | -0.003 | -0.021 | 0 | -0.024 |
| 6C   | 0.002  | 0.007  | 0 | 0.008  |
| 7C   | 0.001  | -0.002 | 0 | -0.001 |
| 8C   | 0      | -0.002 | 0 | -0.002 |
| 9C   | 0.01   | 0.066  | 0 | 0.076  |
| 10C  | 0.001  | -0.017 | 0 | -0.016 |
| 11C  | -0.003 | -0.022 | 0 | -0.025 |
| 12C  | 0.002  | 0.007  | 0 | 0.008  |
| 13N  | 0      | -0.015 | 0 | -0.014 |
| 14N  | 0.01   | 0.31   | 0 | 0.32   |
| 15N  | 0.01   | 0.273  | 0 | 0.283  |
| 16N  | 0.005  | 0.074  | 0 | 0.079  |
| 17N  | 0      | -0.013 | 0 | -0.012 |
| 18N  | 0.01   | 0.314  | 0 | 0.323  |
| 19N  | 0.01   | 0.276  | 0 | 0.286  |
| 20N  | 0.005  | 0.074  | 0 | 0.079  |
| 21O  | -0.003 | -0.054 | 0 | -0.057 |
| 22O  | 0      | -0.006 | 0 | -0.006 |
| 23O  | -0.003 | -0.021 | 0 | -0.024 |
| 24O  | 0      | -0.001 | 0 | -0.001 |
| 25O  | -0.002 | -0.018 | 0 | -0.02  |
| 26O  | 0      | -0.001 | 0 | -0.001 |
| 27O  | 0      | 0      | 0 | 0      |

|     |        |        |   |        |
|-----|--------|--------|---|--------|
| 28O | -0.001 | -0.012 | 0 | -0.013 |
| 29O | 0      | 0.001  | 0 | 0.002  |
| 30O | 0      | -0.007 | 0 | -0.007 |
| 31O | 0      | 0      | 0 | 0      |
| 32O | 0      | -0.005 | 0 | -0.005 |
| 33O | 0      | 0.006  | 0 | 0.006  |
| 34O | 0.001  | 0      | 0 | 0.001  |
| 35O | 0      | 0.008  | 0 | 0.008  |
| 36O | 0      | -0.001 | 0 | 0      |
| 37O | 0      | 0.01   | 0 | 0.011  |
| 38O | 0      | 0.001  | 0 | 0.001  |
| 39O | 0      | -0.005 | 0 | -0.005 |
| 40O | 0      | -0.001 | 0 | -0.001 |
| 41O | 0      | -0.002 | 0 | -0.002 |
| 42O | 0      | -0.002 | 0 | -0.002 |
| 43O | 0      | 0.001  | 0 | 0.002  |
| 44O | 0      | -0.001 | 0 | -0.001 |
| 45O | 0      | 0.005  | 0 | 0.005  |
| 46O | 0      | 0.005  | 0 | 0.005  |
| 47O | 0.001  | 0.014  | 0 | 0.015  |
| 48O | 0.001  | 0.002  | 0 | 0.003  |
| 49O | 0      | 0.004  | 0 | 0.004  |
| 50O | 0      | -0.002 | 0 | -0.002 |
| 51O | 0      | -0.001 | 0 | -0.001 |
| 52O | 0      | 0.004  | 0 | 0.004  |
| 53O | 0.003  | 0.015  | 0 | 0.018  |
| 54O | 0      | 0      | 0 | 0      |
| 55O | -0.003 | -0.055 | 0 | -0.058 |
| 56O | 0      | -0.005 | 0 | -0.005 |
| 57O | -0.003 | -0.022 | 0 | -0.025 |
| 58O | 0      | -0.001 | 0 | -0.001 |
| 59O | -0.002 | -0.018 | 0 | -0.02  |
| 60O | 0      | -0.001 | 0 | -0.001 |
| 61O | 0      | 0.002  | 0 | 0.002  |
| 62O | 0      | -0.005 | 0 | -0.005 |
| 63O | 0      | 0.002  | 0 | 0.002  |
| 64O | 0      | -0.006 | 0 | -0.006 |
| 65O | 0      | 0      | 0 | 0      |
| 66O | 0      | -0.006 | 0 | -0.006 |
| 67O | 0      | -0.001 | 0 | -0.001 |
| 68O | 0      | -0.007 | 0 | -0.007 |
| 69O | 0      | 0.009  | 0 | 0.01   |
| 70O | 0      | -0.003 | 0 | -0.002 |

|      |        |        |        |        |
|------|--------|--------|--------|--------|
| 71O  | 0      | 0.009  | 0      | 0.01   |
| 72O  | 0      | 0.007  | 0      | 0.007  |
| 73O  | 0      | -0.004 | 0      | -0.005 |
| 74O  | 0      | 0.003  | 0      | 0.003  |
| 75O  | 0      | -0.005 | 0      | -0.006 |
| 76O  | 0      | -0.001 | 0      | -0.001 |
| 77O  | 0      | 0      | 0      | 0      |
| 78O  | 0      | 0      | 0      | 0      |
| 79O  | 0      | 0.006  | 0      | 0.006  |
| 80O  | 0      | 0.009  | 0      | 0.009  |
| 81O  | 0.001  | 0.008  | 0      | 0.009  |
| 82O  | 0      | 0      | 0      | 0      |
| 83O  | 0      | 0.006  | 0      | 0.006  |
| 84O  | 0      | -0.003 | 0      | -0.003 |
| 85O  | 0      | -0.004 | 0      | -0.004 |
| 86O  | 0.001  | 0.016  | 0      | 0.017  |
| 87O  | 0.002  | 0.01   | 0      | 0.012  |
| 88O  | 0      | 0.001  | 0      | 0.001  |
| 89Si | 0      | -0.001 | 0      | -0.001 |
| 90Si | 0      | -0.001 | 0      | -0.001 |
| 91Cu | 0.001  | 0.001  | -0.313 | -0.311 |
| 92Cu | 0      | 0      | -0.019 | -0.018 |
| 93Cu | -0.003 | 0.009  | 0.148  | 0.154  |
| 94Cu | 0      | 0.001  | 0.047  | 0.047  |
| 95Cu | 0.001  | 0.001  | -0.312 | -0.31  |
| 96Cu | 0      | 0      | -0.019 | -0.019 |
| 97Cu | -0.003 | 0.009  | 0.147  | 0.152  |
| 98Cu | 0      | 0.001  | 0.048  | 0.049  |
| 99W  | 0      | -0.001 | 0.022  | 0.02   |
| 100W | 0.001  | 0.001  | 0.028  | 0.03   |
| 101W | 0      | 0      | 0      | 0      |
| 102W | 0.003  | 0.007  | 0.169  | 0.179  |
| 103W | 0.004  | 0.007  | 0.291  | 0.303  |
| 104W | 0      | 0      | 0.061  | 0.061  |
| 105W | 0.001  | 0.001  | 0.065  | 0.067  |
| 106W | 0.002  | 0.002  | 0.108  | 0.111  |
| 107W | 0      | 0      | 0.002  | 0.002  |
| 108W | 0      | -0.001 | 0.048  | 0.048  |
| 109W | 0      | 0      | 0.014  | 0.014  |
| 110W | 0.001  | 0.001  | 0.037  | 0.038  |
| 111W | 0.001  | 0.003  | 0.114  | 0.119  |
| 112W | 0.004  | 0.006  | 0.222  | 0.232  |
| 113W | 0      | 0      | 0.061  | 0.061  |

|      |        |       |       |        |
|------|--------|-------|-------|--------|
| 114W | 0.002  | 0.006 | 0.143 | 0.151  |
| 115W | 0.001  | 0.001 | 0.062 | 0.064  |
| 116W | 0      | 0     | 0.003 | 0.004  |
| 117H | 0.002  | 0     | 0     | 0.002  |
| 118H | 0      | 0     | 0     | 0      |
| 119H | -0.001 | 0     | 0     | -0.001 |
| 120H | -0.001 | 0     | 0     | -0.001 |
| 121H | 0.002  | 0     | 0     | 0.002  |
| 122H | 0      | 0     | 0     | 0      |
| 123H | -0.001 | 0     | 0     | -0.001 |
| 124H | 0      | 0     | 0     | 0      |
| 125H | 0.002  | 0     | 0     | 0.002  |
| 126H | 0      | 0     | 0     | 0      |
| 127H | 0.002  | 0     | 0     | 0.002  |
| 128H | -0.002 | 0     | 0     | -0.002 |
| 129H | 0      | 0     | 0     | 0      |
| 130H | 0.002  | 0     | 0     | 0.002  |
| 131H | 0.006  | 0     | 0     | 0.006  |
| 132H | 0.003  | 0     | 0     | 0.003  |
| 133H | 0      | 0.001 | 0     | 0      |
| 134H | 0.001  | 0     | 0     | 0.001  |
| 135H | 0.012  | 0     | 0     | 0.012  |
| 136H | 0      | 0     | 0     | 0      |
| 137H | 0.002  | 0     | 0     | 0.001  |
| 138H | 0.001  | 0     | 0     | 0.001  |
| 139H | 0.001  | 0.001 | 0     | 0.001  |
| 140H | 0.004  | 0     | 0     | 0.004  |
| 141H | 0.001  | 0     | 0     | 0.001  |
| 142H | 0.001  | 0.001 | 0     | 0.001  |
| 143H | 0.003  | 0     | 0     | 0.003  |
| 144H | 0.009  | 0     | 0     | 0.008  |
| 145H | 0      | 0     | 0     | 0      |
| 146H | 0      | 0.001 | 0     | 0.001  |
| 147H | 0      | 0     | 0     | 0      |
| 148H | -0.002 | 0.001 | 0     | -0.001 |
| 149H | 0      | 0     | 0     | 0      |
| 150H | -0.002 | 0.001 | 0     | -0.001 |

**Table S8.** The charge of 2.

| Atom | s     | p     | d | total |
|------|-------|-------|---|-------|
| 1C   | 0.863 | 1.66  | 0 | 2.523 |
| 2C   | 0.86  | 1.666 | 0 | 2.526 |

|     |       |       |   |       |
|-----|-------|-------|---|-------|
| 3C  | 0.842 | 1.797 | 0 | 2.64  |
| 4C  | 0.862 | 1.661 | 0 | 2.523 |
| 5C  | 0.86  | 1.666 | 0 | 2.526 |
| 6C  | 0.843 | 1.797 | 0 | 2.64  |
| 7N  | 1.289 | 2.248 | 0 | 3.537 |
| 8N  | 1.302 | 2.236 | 0 | 3.538 |
| 9N  | 1.288 | 2.25  | 0 | 3.538 |
| 10N | 1.302 | 2.236 | 0 | 3.538 |
| 11O | 1.601 | 3.489 | 0 | 5.09  |
| 12O | 1.593 | 3.51  | 0 | 5.103 |
| 13O | 1.602 | 3.479 | 0 | 5.081 |
| 14O | 1.597 | 3.499 | 0 | 5.096 |
| 15O | 1.596 | 3.516 | 0 | 5.112 |
| 16O | 1.597 | 3.512 | 0 | 5.108 |
| 17O | 1.607 | 3.431 | 0 | 5.037 |
| 18O | 1.598 | 3.466 | 0 | 5.064 |
| 19O | 1.605 | 3.445 | 0 | 5.05  |
| 20O | 1.609 | 3.449 | 0 | 5.058 |
| 21O | 1.594 | 3.519 | 0 | 5.113 |
| 22O | 1.598 | 3.488 | 0 | 5.087 |
| 23O | 1.608 | 3.436 | 0 | 5.044 |
| 24O | 1.601 | 3.484 | 0 | 5.084 |
| 25O | 1.601 | 3.489 | 0 | 5.09  |
| 26O | 1.597 | 3.465 | 0 | 5.061 |
| 27O | 1.581 | 3.597 | 0 | 5.178 |
| 28O | 1.582 | 3.612 | 0 | 5.194 |
| 29O | 1.595 | 3.623 | 0 | 5.218 |
| 30O | 1.597 | 3.621 | 0 | 5.218 |
| 31O | 1.595 | 3.513 | 0 | 5.108 |
| 32O | 1.579 | 3.589 | 0 | 5.169 |
| 33O | 1.586 | 3.572 | 0 | 5.158 |
| 34O | 1.601 | 3.493 | 0 | 5.094 |
| 35O | 1.602 | 3.474 | 0 | 5.077 |
| 36O | 1.603 | 3.485 | 0 | 5.087 |
| 37O | 1.602 | 3.498 | 0 | 5.1   |
| 38O | 1.589 | 3.652 | 0 | 5.241 |
| 39O | 1.592 | 3.648 | 0 | 5.24  |
| 40O | 1.59  | 3.66  | 0 | 5.25  |
| 41O | 1.589 | 3.655 | 0 | 5.244 |
| 42O | 1.59  | 3.639 | 0 | 5.23  |
| 43O | 1.595 | 3.601 | 0 | 5.196 |
| 44O | 1.587 | 3.672 | 0 | 5.259 |
| 45O | 1.601 | 3.491 | 0 | 5.091 |

|      |       |       |       |       |
|------|-------|-------|-------|-------|
| 46O  | 1.593 | 3.508 | 0     | 5.102 |
| 47O  | 1.602 | 3.481 | 0     | 5.083 |
| 48O  | 1.596 | 3.507 | 0     | 5.103 |
| 49O  | 1.597 | 3.509 | 0     | 5.105 |
| 50O  | 1.597 | 3.511 | 0     | 5.108 |
| 51O  | 1.606 | 3.434 | 0     | 5.04  |
| 52O  | 1.598 | 3.466 | 0     | 5.064 |
| 53O  | 1.605 | 3.444 | 0     | 5.049 |
| 54O  | 1.609 | 3.447 | 0     | 5.056 |
| 55O  | 1.594 | 3.519 | 0     | 5.114 |
| 56O  | 1.599 | 3.488 | 0     | 5.086 |
| 57O  | 1.608 | 3.438 | 0     | 5.046 |
| 58O  | 1.602 | 3.481 | 0     | 5.083 |
| 59O  | 1.602 | 3.488 | 0     | 5.09  |
| 60O  | 1.597 | 3.465 | 0     | 5.062 |
| 61O  | 1.581 | 3.597 | 0     | 5.178 |
| 62O  | 1.582 | 3.614 | 0     | 5.196 |
| 63O  | 1.595 | 3.623 | 0     | 5.218 |
| 64O  | 1.596 | 3.625 | 0     | 5.221 |
| 65O  | 1.595 | 3.512 | 0     | 5.107 |
| 66O  | 1.58  | 3.59  | 0     | 5.17  |
| 67O  | 1.586 | 3.572 | 0     | 5.158 |
| 68O  | 1.601 | 3.494 | 0     | 5.095 |
| 69O  | 1.601 | 3.479 | 0     | 5.079 |
| 70O  | 1.603 | 3.483 | 0     | 5.086 |
| 71O  | 1.601 | 3.504 | 0     | 5.106 |
| 72O  | 1.587 | 3.657 | 0     | 5.244 |
| 73O  | 1.59  | 3.652 | 0     | 5.242 |
| 74O  | 1.59  | 3.659 | 0     | 5.25  |
| 75O  | 1.59  | 3.652 | 0     | 5.242 |
| 76O  | 1.591 | 3.639 | 0     | 5.23  |
| 77O  | 1.595 | 3.602 | 0     | 5.197 |
| 78O  | 1.589 | 3.669 | 0     | 5.258 |
| 79Si | 0.674 | 1.017 | 0     | 1.691 |
| 80Si | 0.674 | 1.017 | 0     | 1.691 |
| 81Cu | 0.325 | 0.366 | 9.231 | 9.922 |
| 82Cu | 0.408 | 0.407 | 9.132 | 9.947 |
| 83Cu | 0.331 | 0.372 | 9.26  | 9.963 |
| 84Cu | 0.325 | 0.366 | 9.233 | 9.923 |
| 85Cu | 0.408 | 0.408 | 9.134 | 9.95  |
| 86Cu | 0.332 | 0.373 | 9.261 | 9.965 |
| 87W  | 0.748 | 1.075 | 4.381 | 6.204 |
| 88W  | 0.742 | 1.066 | 4.314 | 6.121 |

|      |       |       |       |       |
|------|-------|-------|-------|-------|
| 89W  | 0.747 | 1.064 | 4.356 | 6.167 |
| 90W  | 0.757 | 1.085 | 4.348 | 6.19  |
| 91W  | 0.758 | 1.078 | 4.364 | 6.2   |
| 92W  | 0.733 | 1.058 | 4.312 | 6.103 |
| 93W  | 0.76  | 1.095 | 4.381 | 6.236 |
| 94W  | 0.763 | 1.114 | 4.377 | 6.254 |
| 95W  | 0.754 | 1.076 | 4.336 | 6.166 |
| 96W  | 0.752 | 1.074 | 4.379 | 6.205 |
| 97W  | 0.739 | 1.065 | 4.315 | 6.119 |
| 98W  | 0.741 | 1.066 | 4.352 | 6.158 |
| 99W  | 0.757 | 1.087 | 4.339 | 6.183 |
| 100W | 0.758 | 1.076 | 4.367 | 6.202 |
| 101W | 0.737 | 1.057 | 4.315 | 6.11  |
| 102W | 0.76  | 1.095 | 4.384 | 6.239 |
| 103W | 0.764 | 1.113 | 4.384 | 6.262 |
| 104W | 0.753 | 1.074 | 4.342 | 6.169 |
| 105H | 0.636 | 0.041 | 0     | 0.677 |
| 106H | 0.641 | 0.041 | 0     | 0.682 |
| 107H | 0.641 | 0.041 | 0     | 0.682 |
| 108H | 0.639 | 0.043 | 0     | 0.682 |
| 109H | 0.637 | 0.041 | 0     | 0.678 |
| 110H | 0.639 | 0.041 | 0     | 0.679 |
| 111H | 0.642 | 0.042 | 0     | 0.684 |
| 112H | 0.639 | 0.043 | 0     | 0.683 |
| 113H | 0.561 | 0.105 | 0     | 0.666 |
| 114H | 0.598 | 0.116 | 0     | 0.714 |
| 115H | 0.593 | 0.11  | 0     | 0.703 |
| 116H | 0.591 | 0.114 | 0     | 0.706 |
| 117H | 0.599 | 0.112 | 0     | 0.711 |
| 118H | 0.593 | 0.115 | 0     | 0.709 |
| 119H | 0.545 | 0.1   | 0     | 0.645 |
| 120H | 0.598 | 0.115 | 0     | 0.712 |
| 121H | 0.522 | 0.092 | 0     | 0.614 |
| 122H | 0.542 | 0.098 | 0     | 0.64  |
| 123H | 0.595 | 0.115 | 0     | 0.71  |
| 124H | 0.521 | 0.092 | 0     | 0.613 |
| 125H | 0.56  | 0.104 | 0     | 0.664 |
| 126H | 0.6   | 0.117 | 0     | 0.717 |
| 127H | 0.597 | 0.112 | 0     | 0.709 |
| 128H | 0.591 | 0.114 | 0     | 0.705 |
| 129H | 0.595 | 0.111 | 0     | 0.705 |
| 130H | 0.593 | 0.114 | 0     | 0.707 |

**Table S9.** The magnetic configuration (spin) of **2**

| Atom | s      | p      | d | total  |
|------|--------|--------|---|--------|
| 1C   | 0.005  | 0.068  | 0 | 0.073  |
| 2C   | 0.002  | 0.017  | 0 | 0.019  |
| 3C   | 0      | 0      | 0 | 0      |
| 4C   | 0.005  | 0.07   | 0 | 0.075  |
| 5C   | 0.002  | 0.019  | 0 | 0.021  |
| 6C   | 0      | 0      | 0 | 0.001  |
| 7N   | 0.007  | 0.145  | 0 | 0.152  |
| 8N   | 0.009  | 0.255  | 0 | 0.265  |
| 9N   | 0.007  | 0.157  | 0 | 0.164  |
| 10N  | 0.009  | 0.256  | 0 | 0.265  |
| 11O  | 0      | 0.004  | 0 | 0.005  |
| 12O  | 0      | -0.003 | 0 | -0.003 |
| 13O  | 0      | -0.002 | 0 | -0.002 |
| 14O  | 0      | -0.01  | 0 | -0.011 |
| 15O  | 0      | -0.005 | 0 | -0.005 |
| 16O  | -0.001 | -0.017 | 0 | -0.018 |
| 17O  | 0      | 0      | 0 | 0      |
| 18O  | 0.001  | 0.001  | 0 | 0.002  |
| 19O  | 0      | -0.002 | 0 | -0.001 |
| 20O  | 0      | -0.001 | 0 | -0.001 |
| 21O  | 0      | -0.001 | 0 | -0.001 |
| 22O  | 0      | 0.004  | 0 | 0.004  |
| 23O  | -0.002 | -0.013 | 0 | -0.015 |
| 24O  | 0      | 0.003  | 0 | 0.003  |
| 25O  | 0      | -0.005 | 0 | -0.006 |
| 26O  | -0.002 | -0.017 | 0 | -0.019 |
| 27O  | 0.001  | 0.003  | 0 | 0.004  |
| 28O  | 0      | -0.001 | 0 | -0.001 |
| 29O  | 0.001  | 0.003  | 0 | 0.004  |
| 30O  | 0.001  | 0.007  | 0 | 0.008  |
| 31O  | 0      | -0.005 | 0 | -0.006 |
| 32O  | 0      | -0.002 | 0 | -0.002 |
| 33O  | -0.002 | -0.038 | 0 | -0.04  |
| 34O  | 0      | -0.001 | 0 | -0.001 |
| 35O  | 0      | 0.002  | 0 | 0.002  |
| 36O  | 0      | -0.009 | 0 | -0.009 |
| 37O  | 0      | 0.004  | 0 | 0.004  |
| 38O  | 0      | 0.004  | 0 | 0.004  |



|      |        |        |        |        |
|------|--------|--------|--------|--------|
| 39O  | 0.003  | 0.015  | 0      | 0.018  |
| 40O  | 0      | 0.002  | 0      | 0.002  |
| 41O  | 0      | 0.001  | 0      | 0.001  |
| 42O  | 0.003  | 0.013  | 0      | 0.016  |
| 43O  | 0.001  | 0.004  | 0      | 0.005  |
| 44O  | 0.001  | 0.01   | 0      | 0.011  |
| 45O  | 0      | 0.004  | 0      | 0.004  |
| 46O  | 0      | -0.004 | 0      | -0.004 |
| 47O  | 0      | -0.004 | 0      | -0.004 |
| 48O  | 0      | -0.006 | 0      | -0.006 |
| 49O  | 0      | -0.008 | 0      | -0.009 |
| 50O  | -0.001 | -0.018 | 0      | -0.019 |
| 51O  | 0      | -0.001 | 0      | -0.002 |
| 52O  | 0.001  | 0.003  | 0      | 0.004  |
| 53O  | 0      | 0      | 0      | 0.001  |
| 54O  | 0      | 0.002  | 0      | 0.002  |
| 55O  | 0      | -0.001 | 0      | -0.001 |
| 56O  | 0      | 0.004  | 0      | 0.004  |
| 57O  | -0.002 | -0.014 | 0      | -0.016 |
| 58O  | 0      | 0.003  | 0      | 0.003  |
| 59O  | 0      | -0.004 | 0      | -0.004 |
| 60O  | -0.002 | -0.016 | 0      | -0.018 |
| 61O  | 0      | -0.002 | 0      | -0.002 |
| 62O  | 0      | -0.001 | 0      | -0.001 |
| 63O  | 0.001  | 0.004  | 0      | 0.005  |
| 64O  | 0.001  | 0.006  | 0      | 0.007  |
| 65O  | 0      | -0.005 | 0      | -0.005 |
| 66O  | 0      | 0.002  | 0      | 0.003  |
| 67O  | -0.002 | -0.038 | 0      | -0.04  |
| 68O  | 0      | -0.001 | 0      | 0      |
| 69O  | 0      | 0.001  | 0      | 0.001  |
| 70O  | 0      | -0.005 | 0      | -0.006 |
| 71O  | 0      | 0.001  | 0      | 0.001  |
| 72O  | 0      | 0.005  | 0      | 0.005  |
| 73O  | 0.003  | 0.017  | 0      | 0.019  |
| 74O  | 0      | 0.004  | 0      | 0.004  |
| 75O  | 0      | 0.001  | 0      | 0.002  |
| 76O  | 0.003  | 0.013  | 0      | 0.016  |
| 77O  | 0.001  | 0.003  | 0      | 0.004  |
| 78O  | 0.001  | 0.009  | 0      | 0.01   |
| 79Si | 0      | -0.001 | 0      | -0.001 |
| 80Si | 0      | -0.001 | 0      | -0.001 |
| 81Cu | 0.001  | 0.001  | -0.233 | -0.231 |

|      |        |        |        |        |
|------|--------|--------|--------|--------|
| 82Cu | -0.006 | 0.01   | 0.123  | 0.127  |
| 83Cu | 0      | 0      | -0.01  | -0.009 |
| 84Cu | 0.001  | 0.001  | -0.237 | -0.235 |
| 85Cu | -0.006 | 0.011  | 0.124  | 0.129  |
| 86Cu | 0      | 0      | -0.012 | -0.011 |
| 87W  | 0      | 0      | 0.016  | 0.016  |
| 88W  | 0.001  | 0.001  | 0.034  | 0.035  |
| 89W  | 0.004  | 0.008  | 0.285  | 0.297  |
| 90W  | 0.001  | 0.001  | 0.088  | 0.09   |
| 91W  | 0.001  | 0.002  | 0.055  | 0.058  |
| 92W  | 0.004  | 0.01   | 0.297  | 0.311  |
| 93W  | 0      | -0.001 | 0.035  | 0.034  |
| 94W  | 0.002  | 0.003  | 0.134  | 0.138  |
| 95W  | 0.001  | 0.002  | 0.081  | 0.084  |
| 96W  | 0.001  | 0.001  | 0.032  | 0.033  |
| 97W  | 0.001  | 0      | 0.042  | 0.043  |
| 98W  | 0.004  | 0.011  | 0.282  | 0.297  |
| 99W  | 0      | 0      | 0.061  | 0.061  |
| 100W | 0.001  | 0.002  | 0.066  | 0.069  |
| 101W | 0.005  | 0.008  | 0.29   | 0.303  |
| 102W | 0      | 0      | 0.046  | 0.046  |
| 103W | 0.003  | 0.004  | 0.145  | 0.151  |
| 104W | 0.002  | 0.002  | 0.099  | 0.102  |
| 105H | 0.001  | 0      | 0      | 0.001  |
| 106H | 0      | 0      | 0      | 0      |
| 107H | 0.003  | 0      | 0      | 0.003  |
| 108H | -0.002 | 0.001  | 0      | -0.001 |
| 109H | 0      | 0      | 0      | 0      |
| 110H | 0.003  | 0      | 0      | 0.003  |
| 111H | 0.001  | 0      | 0      | 0.001  |
| 112H | -0.002 | 0.001  | 0      | -0.001 |
| 113H | 0.002  | 0      | 0      | 0.002  |
| 114H | 0      | 0      | 0      | 0      |
| 115H | 0.014  | 0      | 0      | 0.013  |
| 116H | 0.001  | 0      | 0      | 0.001  |
| 117H | 0.014  | 0      | 0      | 0.013  |
| 118H | 0.005  | 0      | 0      | 0.005  |
| 119H | 0.001  | 0.001  | 0      | 0.002  |
| 120H | 0.001  | 0      | 0      | 0.001  |
| 121H | 0.004  | 0      | 0      | 0.005  |
| 122H | 0.002  | 0.001  | 0      | 0.003  |
| 123H | 0      | 0      | 0      | 0      |
| 124H | 0.004  | 0.001  | 0      | 0.004  |

|      |       |   |   |       |
|------|-------|---|---|-------|
| 125H | 0.003 | 0 | 0 | 0.003 |
| 126H | 0     | 0 | 0 | 0     |
| 127H | 0.013 | 0 | 0 | 0.013 |
| 128H | 0.001 | 0 | 0 | 0.001 |
| 129H | 0.013 | 0 | 0 | 0.013 |
| 130H | 0.006 | 0 | 0 | 0.006 |

**Table S 10.** The information of **1** geometric configuration  
Crystal lattice:

|                  |           |
|------------------|-----------|
| cell_length_a    | 25.00000  |
| cell_length_b    | 25.00000  |
| cell_length_c    | 25.00000  |
| cell_angle_alpha | 90.000000 |
| cell_angle_beta  | 90.000000 |
| cell_angle_gamma | 90.000000 |

| Atom | x       | y       | z       |
|------|---------|---------|---------|
| 1C   | 0.30075 | 0.53454 | 0.32154 |
| 2C   | 0.77967 | 0.57025 | 0.39587 |
| 3C   | 0.704   | 0.54554 | 0.33458 |
| 4C   | 0.73885 | 0.5285  | 0.3821  |
| 5C   | 0.27103 | 0.50559 | 0.35898 |
| 6C   | 0.26467 | 0.44525 | 0.34258 |
| 7C   | 0.69925 | 0.46546 | 0.67846 |
| 8C   | 0.22033 | 0.42975 | 0.60413 |
| 9C   | 0.296   | 0.45446 | 0.66542 |
| 10C  | 0.26115 | 0.4715  | 0.6179  |
| 11C  | 0.72897 | 0.49441 | 0.64102 |
| 12C  | 0.73534 | 0.55475 | 0.65742 |
| 13N  | 0.35974 | 0.51177 | 0.31725 |
| 14N  | 0.69943 | 0.51711 | 0.42563 |
| 15N  | 0.30237 | 0.50896 | 0.41158 |
| 16N  | 0.65487 | 0.51399 | 0.32831 |
| 17N  | 0.64026 | 0.48823 | 0.68275 |
| 18N  | 0.30057 | 0.48289 | 0.57437 |
| 19N  | 0.69763 | 0.49104 | 0.58842 |
| 20N  | 0.34513 | 0.48601 | 0.67169 |
| 21O  | 0.50109 | 0.45517 | 0.47275 |
| 22O  | 0.36776 | 0.30567 | 0.48113 |
| 23O  | 0.38752 | 0.45338 | 0.46446 |
| 24O  | 0.45007 | 0.3646  | 0.49815 |
| 25O  | 0.61477 | 0.45588 | 0.46947 |
| 26O  | 0.55578 | 0.36737 | 0.49994 |
| 27O  | 0.39487 | 0.39076 | 0.28913 |

|     |         |         |         |
|-----|---------|---------|---------|
| 28O | 0.45479 | 0.26686 | 0.43463 |
| 29O | 0.36294 | 0.38724 | 0.54786 |
| 30O | 0.55826 | 0.26998 | 0.43695 |
| 31O | 0.50116 | 0.36289 | 0.60219 |
| 32O | 0.64084 | 0.31031 | 0.48691 |
| 33O | 0.41865 | 0.30177 | 0.57477 |
| 34O | 0.56334 | 0.45903 | 0.36914 |
| 35O | 0.50597 | 0.3943  | 0.30549 |
| 36O | 0.44347 | 0.44972 | 0.57806 |
| 37O | 0.64003 | 0.39336 | 0.55252 |
| 38O | 0.44522 | 0.45448 | 0.36563 |
| 39O | 0.61842 | 0.37542 | 0.40296 |
| 40O | 0.45379 | 0.30905 | 0.33736 |
| 41O | 0.56069 | 0.31252 | 0.33785 |
| 42O | 0.50461 | 0.36833 | 0.40716 |
| 43O | 0.40273 | 0.3796  | 0.65257 |
| 44O | 0.55573 | 0.45167 | 0.5815  |
| 45O | 0.70879 | 0.39607 | 0.46419 |
| 46O | 0.58665 | 0.30488 | 0.57835 |
| 47O | 0.40646 | 0.20801 | 0.51585 |
| 48O | 0.61636 | 0.3986  | 0.29244 |
| 49O | 0.29651 | 0.38974 | 0.46062 |
| 50O | 0.38832 | 0.37019 | 0.39868 |
| 51O | 0.50354 | 0.26366 | 0.52515 |
| 52O | 0.60317 | 0.21118 | 0.52176 |
| 53O | 0.51031 | 0.21476 | 0.35157 |
| 54O | 0.5982  | 0.38222 | 0.65577 |
| 55O | 0.49891 | 0.54483 | 0.52725 |
| 56O | 0.63224 | 0.69433 | 0.51887 |
| 57O | 0.61248 | 0.54662 | 0.53554 |
| 58O | 0.54993 | 0.6354  | 0.50185 |
| 59O | 0.38523 | 0.54412 | 0.53053 |
| 60O | 0.44422 | 0.63263 | 0.50006 |
| 61O | 0.60513 | 0.60924 | 0.71087 |
| 62O | 0.54521 | 0.73314 | 0.56537 |
| 63O | 0.63706 | 0.61276 | 0.45214 |
| 64O | 0.44174 | 0.73002 | 0.56305 |
| 65O | 0.49884 | 0.63711 | 0.39781 |
| 66O | 0.35916 | 0.68969 | 0.51309 |
| 67O | 0.58135 | 0.69823 | 0.42523 |
| 68O | 0.43666 | 0.54097 | 0.63086 |
| 69O | 0.49403 | 0.6057  | 0.69451 |
| 70O | 0.55653 | 0.55028 | 0.42194 |

|      |         |         |         |
|------|---------|---------|---------|
| 71O  | 0.35997 | 0.60664 | 0.44748 |
| 72O  | 0.55478 | 0.54552 | 0.63437 |
| 73O  | 0.38158 | 0.62458 | 0.59704 |
| 74O  | 0.54621 | 0.69095 | 0.66264 |
| 75O  | 0.43931 | 0.68748 | 0.66215 |
| 76O  | 0.49539 | 0.63167 | 0.59284 |
| 77O  | 0.59727 | 0.6204  | 0.34743 |
| 78O  | 0.44427 | 0.54833 | 0.4185  |
| 79O  | 0.29121 | 0.60393 | 0.53581 |
| 80O  | 0.41335 | 0.69512 | 0.42165 |
| 81O  | 0.59354 | 0.79199 | 0.48415 |
| 82O  | 0.38364 | 0.6014  | 0.70756 |
| 83O  | 0.70349 | 0.61026 | 0.53938 |
| 84O  | 0.61168 | 0.62981 | 0.60132 |
| 85O  | 0.49646 | 0.73634 | 0.47485 |
| 86O  | 0.39683 | 0.78882 | 0.47824 |
| 87O  | 0.48969 | 0.78524 | 0.64843 |
| 88O  | 0.4018  | 0.61778 | 0.34423 |
| 89Si | 0.50328 | 0.38975 | 0.46863 |
| 90Si | 0.49672 | 0.61025 | 0.53137 |
| 91Cu | 0.55914 | 0.5008  | 0.5017  |
| 92Cu | 0.49757 | 0.49753 | 0.61077 |
| 93Cu | 0.62992 | 0.49055 | 0.39979 |
| 94Cu | 0.37706 | 0.48771 | 0.39289 |
| 95Cu | 0.44086 | 0.4992  | 0.4983  |
| 96Cu | 0.50243 | 0.50247 | 0.38923 |
| 97Cu | 0.37008 | 0.50945 | 0.60021 |
| 98Cu | 0.62294 | 0.51229 | 0.60711 |
| 99W  | 0.36368 | 0.38313 | 0.47104 |
| 100W | 0.42888 | 0.37911 | 0.58869 |
| 101W | 0.43763 | 0.38454 | 0.34302 |
| 102W | 0.43077 | 0.2718  | 0.50627 |
| 103W | 0.50916 | 0.27666 | 0.38047 |
| 104W | 0.64108 | 0.38712 | 0.47419 |
| 105W | 0.57876 | 0.2738  | 0.51073 |
| 106W | 0.57143 | 0.38932 | 0.3433  |
| 107W | 0.57541 | 0.38212 | 0.59159 |
| 108W | 0.63632 | 0.61687 | 0.52896 |
| 109W | 0.57112 | 0.62089 | 0.41131 |
| 110W | 0.56237 | 0.61546 | 0.65698 |
| 111W | 0.56923 | 0.7282  | 0.49373 |
| 112W | 0.49084 | 0.72334 | 0.61953 |
| 113W | 0.35892 | 0.61288 | 0.52581 |

|      |         |         |         |
|------|---------|---------|---------|
| 114W | 0.42124 | 0.7262  | 0.48927 |
| 115W | 0.42857 | 0.61068 | 0.6567  |
| 116W | 0.42459 | 0.61788 | 0.40841 |
| 117H | 0.81268 | 0.57177 | 0.3667  |
| 118H | 0.79716 | 0.56375 | 0.43577 |
| 119H | 0.75971 | 0.60942 | 0.39648 |
| 120H | 0.3051  | 0.42867 | 0.33875 |
| 121H | 0.2436  | 0.44046 | 0.30406 |
| 122H | 0.24196 | 0.42272 | 0.37278 |
| 123H | 0.24071 | 0.39096 | 0.60038 |
| 124H | 0.20027 | 0.43808 | 0.56581 |
| 125H | 0.18928 | 0.42598 | 0.63519 |
| 126H | 0.75884 | 0.57703 | 0.62772 |
| 127H | 0.75523 | 0.55928 | 0.69658 |
| 128H | 0.69508 | 0.5719  | 0.66035 |
| 129H | 0.37591 | 0.42457 | 0.28035 |
| 130H | 0.38572 | 0.41284 | 0.66965 |
| 131H | 0.39119 | 0.18997 | 0.54686 |
| 132H | 0.63632 | 0.43288 | 0.28742 |
| 133H | 0.28127 | 0.42561 | 0.45001 |
| 134H | 0.60185 | 0.17845 | 0.54255 |
| 135H | 0.53178 | 0.19867 | 0.32309 |
| 136H | 0.61764 | 0.45918 | 0.70168 |
| 137H | 0.62374 | 0.57518 | 0.71978 |
| 138H | 0.61423 | 0.58712 | 0.3304  |
| 139H | 0.27383 | 0.56883 | 0.54256 |
| 140H | 0.58321 | 0.82604 | 0.46846 |
| 141H | 0.36342 | 0.56739 | 0.71281 |
| 142H | 0.7188  | 0.57427 | 0.54963 |
| 143H | 0.39017 | 0.81507 | 0.4504  |
| 144H | 0.51296 | 0.80437 | 0.67327 |
| 145H | 0.38228 | 0.54098 | 0.29857 |
| 146H | 0.72623 | 0.43112 | 0.4574  |
| 147H | 0.29077 | 0.56813 | 0.29543 |
| 148H | 0.71558 | 0.57505 | 0.30412 |
| 149H | 0.70919 | 0.43182 | 0.70449 |
| 150H | 0.2844  | 0.42494 | 0.69585 |

**Table S 11.** The information of **2** geometric configuration

Crystal lattice:

|               |          |
|---------------|----------|
| cell_length_a | 25.00000 |
| cell_length_b | 25.00000 |
| cell_length_c | 25.00000 |

cell\_angle\_alpha 90.000000  
cell\_angle\_beta 90.000000  
cell\_angle\_gamma 90.000000

| Atom | x       | y       | z       |
|------|---------|---------|---------|
| 1C   | 0.24407 | 0.47297 | 0.41317 |
| 2C   | 0.27181 | 0.47725 | 0.36489 |
| 3C   | 0.25286 | 0.45501 | 0.31249 |
| 4C   | 0.75593 | 0.52703 | 0.58683 |
| 5C   | 0.72819 | 0.52275 | 0.63511 |
| 6C   | 0.74714 | 0.54499 | 0.68751 |
| 7N   | 0.27179 | 0.49739 | 0.45959 |
| 8N   | 0.33004 | 0.48113 | 0.37183 |
| 9N   | 0.72821 | 0.50261 | 0.54041 |
| 10N  | 0.66996 | 0.51887 | 0.62817 |
| 11O  | 0.33735 | 0.62913 | 0.58139 |
| 12O  | 0.48125 | 0.64613 | 0.63107 |
| 13O  | 0.39805 | 0.70964 | 0.59993 |
| 14O  | 0.43108 | 0.73353 | 0.45533 |
| 15O  | 0.53526 | 0.73094 | 0.4568  |
| 16O  | 0.48384 | 0.74086 | 0.54596 |
| 17O  | 0.41199 | 0.56219 | 0.60979 |
| 18O  | 0.35687 | 0.55406 | 0.50959 |
| 19O  | 0.39545 | 0.45547 | 0.49791 |
| 20O  | 0.45442 | 0.4635  | 0.5895  |
| 21O  | 0.4023  | 0.37576 | 0.56705 |
| 22O  | 0.52028 | 0.41027 | 0.65581 |
| 23O  | 0.53609 | 0.55692 | 0.60748 |
| 24O  | 0.62096 | 0.69393 | 0.50931 |
| 25O  | 0.57132 | 0.31989 | 0.63353 |
| 26O  | 0.58347 | 0.45994 | 0.58447 |
| 27O  | 0.46527 | 0.36324 | 0.46992 |
| 28O  | 0.51825 | 0.37126 | 0.56031 |
| 29O  | 0.26907 | 0.62244 | 0.49305 |
| 30O  | 0.62946 | 0.40702 | 0.67101 |
| 31O  | 0.63646 | 0.37199 | 0.56599 |
| 32O  | 0.57329 | 0.3593  | 0.4717  |
| 33O  | 0.52186 | 0.45207 | 0.49208 |
| 34O  | 0.37953 | 0.38331 | 0.42061 |
| 35O  | 0.34412 | 0.70361 | 0.50683 |
| 36O  | 0.56539 | 0.70331 | 0.60174 |
| 37O  | 0.53635 | 0.67746 | 0.36611 |
| 38O  | 0.38252 | 0.64027 | 0.68374 |

|      |         |         |         |
|------|---------|---------|---------|
| 39O  | 0.58208 | 0.7932  | 0.54135 |
| 40O  | 0.5777  | 0.62575 | 0.68207 |
| 41O  | 0.40976 | 0.41024 | 0.67526 |
| 42O  | 0.38915 | 0.80096 | 0.53659 |
| 43O  | 0.30763 | 0.38989 | 0.50595 |
| 44O  | 0.48643 | 0.7755  | 0.36821 |
| 45O  | 0.66265 | 0.37087 | 0.41861 |
| 46O  | 0.51875 | 0.35387 | 0.36893 |
| 47O  | 0.60195 | 0.29036 | 0.40007 |
| 48O  | 0.56892 | 0.26647 | 0.54467 |
| 49O  | 0.46474 | 0.26906 | 0.5432  |
| 50O  | 0.51616 | 0.25914 | 0.45404 |
| 51O  | 0.58801 | 0.43781 | 0.39021 |
| 52O  | 0.64313 | 0.44594 | 0.49041 |
| 53O  | 0.60455 | 0.54453 | 0.50209 |
| 54O  | 0.54558 | 0.5365  | 0.4105  |
| 55O  | 0.5977  | 0.62424 | 0.43295 |
| 56O  | 0.47972 | 0.58973 | 0.34419 |
| 57O  | 0.46391 | 0.44308 | 0.39252 |
| 58O  | 0.37904 | 0.30607 | 0.49069 |
| 59O  | 0.42868 | 0.68011 | 0.36647 |
| 60O  | 0.41653 | 0.54006 | 0.41553 |
| 61O  | 0.53473 | 0.63676 | 0.53008 |
| 62O  | 0.48175 | 0.62874 | 0.43969 |
| 63O  | 0.73093 | 0.37756 | 0.50695 |
| 64O  | 0.37054 | 0.59298 | 0.32899 |
| 65O  | 0.36354 | 0.62801 | 0.43401 |
| 66O  | 0.42671 | 0.6407  | 0.5283  |
| 67O  | 0.47814 | 0.54793 | 0.50792 |
| 68O  | 0.62047 | 0.61669 | 0.57939 |
| 69O  | 0.65588 | 0.29639 | 0.49317 |
| 70O  | 0.43461 | 0.29669 | 0.39826 |
| 71O  | 0.46365 | 0.32254 | 0.63389 |
| 72O  | 0.61748 | 0.35973 | 0.31626 |
| 73O  | 0.41792 | 0.2068  | 0.45865 |
| 74O  | 0.4223  | 0.37425 | 0.31793 |
| 75O  | 0.59024 | 0.58976 | 0.32474 |
| 76O  | 0.61085 | 0.19904 | 0.46341 |
| 77O  | 0.69237 | 0.61011 | 0.49405 |
| 78O  | 0.51357 | 0.2245  | 0.63179 |
| 79Si | 0.51976 | 0.38734 | 0.49793 |
| 80Si | 0.48024 | 0.61266 | 0.50207 |
| 81Cu | 0.52858 | 0.50371 | 0.55247 |



|      |         |         |         |
|------|---------|---------|---------|
| 82Cu | 0.347   | 0.51285 | 0.44176 |
| 83Cu | 0.40557 | 0.51114 | 0.55251 |
| 84Cu | 0.47142 | 0.49629 | 0.44753 |
| 85Cu | 0.653   | 0.48715 | 0.55824 |
| 86Cu | 0.59443 | 0.48886 | 0.44749 |
| 87W  | 0.45133 | 0.3999  | 0.62148 |
| 88W  | 0.40675 | 0.6328  | 0.61963 |
| 89W  | 0.5581  | 0.72969 | 0.53268 |
| 90W  | 0.58655 | 0.39408 | 0.61947 |
| 91W  | 0.37578 | 0.38501 | 0.49695 |
| 92W  | 0.40995 | 0.73544 | 0.52948 |
| 93W  | 0.55388 | 0.62468 | 0.61799 |
| 94W  | 0.48563 | 0.71751 | 0.40358 |
| 95W  | 0.33666 | 0.62516 | 0.5063  |
| 96W  | 0.54867 | 0.6001  | 0.37852 |
| 97W  | 0.59325 | 0.3672  | 0.38037 |
| 98W  | 0.4419  | 0.27031 | 0.46732 |
| 99W  | 0.41345 | 0.60592 | 0.38053 |
| 100W | 0.62422 | 0.61499 | 0.50305 |
| 101W | 0.59005 | 0.26456 | 0.47052 |
| 102W | 0.44612 | 0.37532 | 0.38201 |
| 103W | 0.51437 | 0.28249 | 0.59642 |
| 104W | 0.66334 | 0.37484 | 0.4937  |
| 105H | 0.25284 | 0.41092 | 0.31391 |
| 106H | 0.27976 | 0.46731 | 0.2799  |
| 107H | 0.21195 | 0.46799 | 0.30239 |
| 108H | 0.204   | 0.45616 | 0.41905 |
| 109H | 0.7645  | 0.58513 | 0.68183 |
| 110H | 0.77832 | 0.52008 | 0.70642 |
| 111H | 0.71338 | 0.54822 | 0.71548 |
| 112H | 0.79593 | 0.54399 | 0.58092 |
| 113H | 0.2512  | 0.58832 | 0.48293 |
| 114H | 0.36886 | 0.61774 | 0.71229 |
| 115H | 0.61915 | 0.80428 | 0.54773 |
| 116H | 0.59555 | 0.59986 | 0.70511 |
| 117H | 0.40667 | 0.83552 | 0.53159 |
| 118H | 0.50599 | 0.79269 | 0.33931 |
| 119H | 0.35085 | 0.55789 | 0.3268  |
| 120H | 0.60844 | 0.55851 | 0.31034 |
| 121H | 0.71291 | 0.57569 | 0.50333 |
| 122H | 0.64831 | 0.44278 | 0.67259 |
| 123H | 0.39424 | 0.38595 | 0.70144 |
| 124H | 0.28683 | 0.42421 | 0.49678 |

|      |         |         |         |
|------|---------|---------|---------|
| 125H | 0.74867 | 0.41178 | 0.51721 |
| 126H | 0.63447 | 0.37967 | 0.28767 |
| 127H | 0.43199 | 0.17058 | 0.46261 |
| 128H | 0.404   | 0.40018 | 0.29527 |
| 129H | 0.64743 | 0.18519 | 0.46555 |
| 130H | 0.53343 | 0.2095  | 0.66177 |

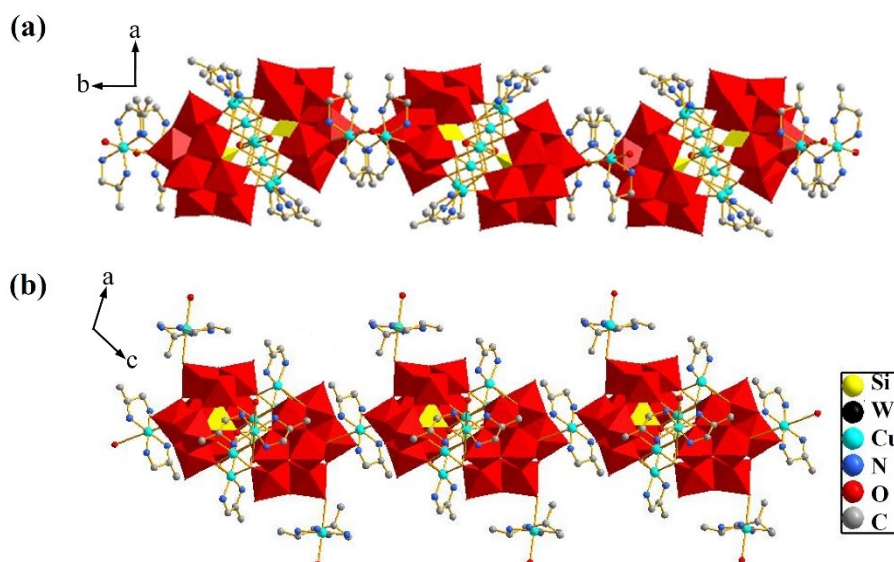

**Fig. S1.** Views of compound **1** along the *c* axis and compound **2** along the *b* axis.

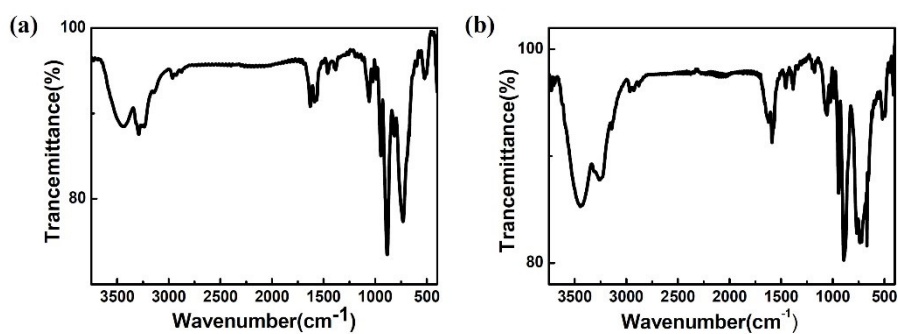

**Figure S2.** IR spectra of **1** and **2**, exhibiting an intense band at  $1040\text{ cm}^{-1}$ , attributed to the feature of  $\nu_{\text{P-O}}$ , and bands at  $940\text{ cm}^{-1}$  due to  $\nu_{\text{W=O}}$ , bands at  $850$ ,  $790$ , and  $710\text{ cm}^{-1}$  due to  $\nu_{\text{M-O-M}}$  ( $\text{M} = \text{W}$  or  $\text{Ni}$ ). The characteristics of the  $-\text{NH}_2$  and  $-\text{CH}_2$  groups are fallen in the  $1400$  and  $3100\text{-}3300\text{ cm}^{-1}$  region.

**1:**  $3439(\text{m})$ ,  $3291(\text{m})$ ,  $1627(\text{m})$ ,  $1460(\text{w})$ ,  $1388(\text{w})$ ,  $1062(\text{m})$ ,  $1022(\text{w})$ ,  $988(\text{w})$ ,  $947(\text{m})$ ,  $884(\text{s})$ ,  $726(\text{s})$ ,  $521(\text{w})$ .

**2:**  $3439(\text{s})$ ,  $3262(\text{m})$ ,  $2979(\text{w})$ ,  $1627(\text{m})$ ,  $1590(\text{m})$ ,  $1455(\text{w})$ ,  $1383(\text{w})$ ,  $1172(\text{w})$ ,  $1062(\text{w})$ ,  $984(\text{s})$ ,  $942(\text{s})$ ,  $904(\text{s})$ ,  $779(\text{s})$ ,  $737(\text{s})$ ,  $660(\text{s})$ ,  $640(\text{m})$ ,  $521(\text{w})$ ,  $492(\text{w})$ .

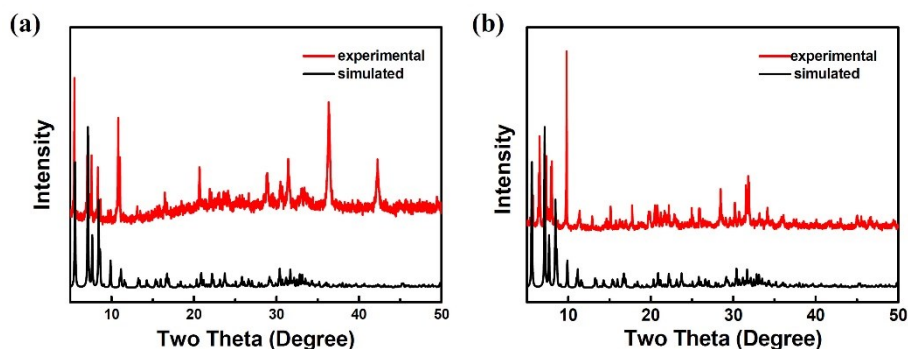

**Figure S3.** The simulated and experimental PXRD patterns of compounds **1** (a) and **2** (b).

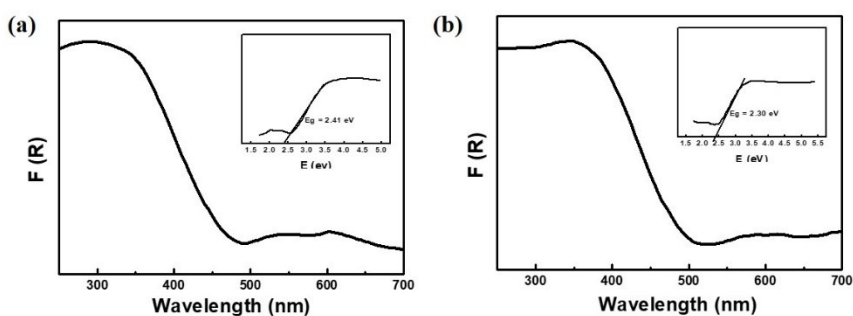

**Figure S4.** UV/Vis-NIR diffuse reflectance spectrum of **1** (a) and **2** (b).

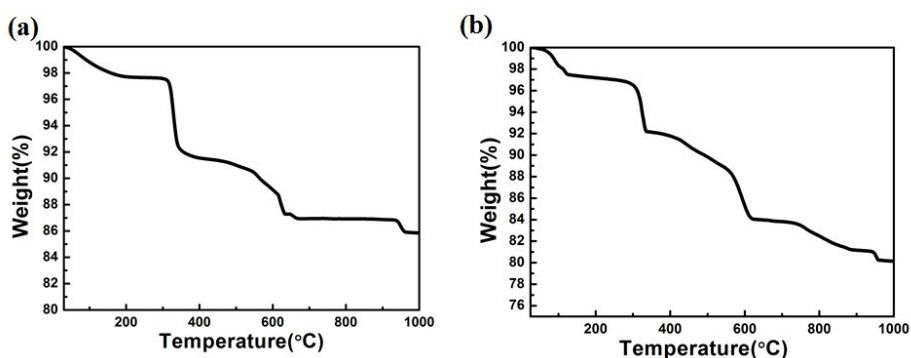

**Figure S5.** The TG curves of **1** (a) and **2** (b).

The thermogravimetric behaviors of **1** and **2** were investigated in the flowing air atmosphere from 25 to 1000 °C (Figure S5).

For **1**, the first weight loss of 2.30% from 25 to 240 °C is assigned to release of 7 lattice water molecules (calcd. 2.20%). From 240 to 480 °C, the weight loss of 6.49% corresponds to release of 2 Cu(dap)<sub>2</sub> groups (calcd. 6.68%). From 480 to 960 °C, the weight loss of 5.32% corresponds to release of 2 coordination water molecules and 4 dap ligands (calcd. 5.08%). For **2**, the first weight loss of 3.0% from 25 to 270 °C is assigned to release of 8 lattice water molecules and 2 coordination water molecules

(calcd. 3.0%). From 270 to 650 °C, the weight loss of 12.96% corresponds to release of 4 Cu(dap)<sub>2</sub> groups (calcd. 12.93%).

### Formula for calculating H<sub>2</sub> production

We choose CH<sub>4</sub> as standard gas. And we can get the standard curve between H<sub>2</sub> and CH<sub>4</sub>:  $y=1.8458x$  ( $x$  is the rate of the peak area of H<sub>2</sub> and CH<sub>4</sub>,  $y$  is the volume of hydrogen production) by GC. And we can get the volume of hydrogen production by testing the peak area of H<sub>2</sub> and CH<sub>4</sub> by GC. Finally, we can get the  $n(\text{H}_2)$  by  $n=V/V_m$ .

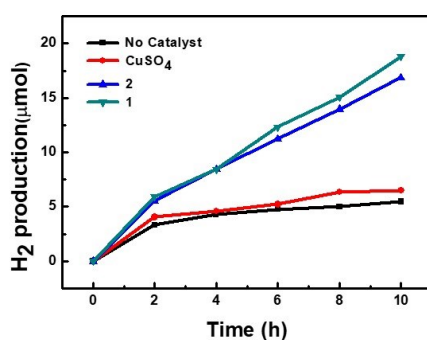

**Fig. S6.** Photocatalytic of **1** (4 mg), **2** (4 mg), CuSO<sub>4</sub> (4 mg) and without catalyst. Conditions: LED light (450 nm), [Ir(ppy)<sub>2</sub>(dtbbpy)][PF<sub>6</sub>] (0.2 mM), 3mL CH<sub>3</sub>CN/DMF (1/3), H<sub>2</sub>O (2 M) deaerated with Ar.

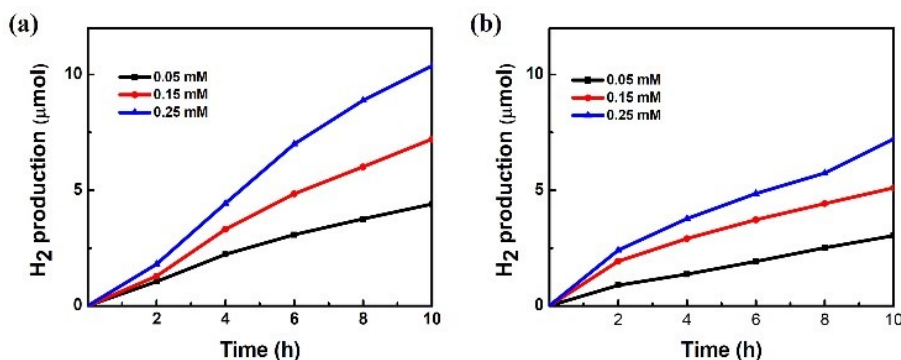

**Fig. S7.** Photocatalytic at different amount of TEOA for **1** (a) and **2** (b). Conditions: LED light (450 nm), [Ir(ppy)<sub>2</sub>(dtbbpy)][PF<sub>6</sub>] (0.2 mM), 3mL CH<sub>3</sub>CN/DMF (1/3), H<sub>2</sub>O (2 M) deaerated with Ar/CH<sub>4</sub> (4:1).

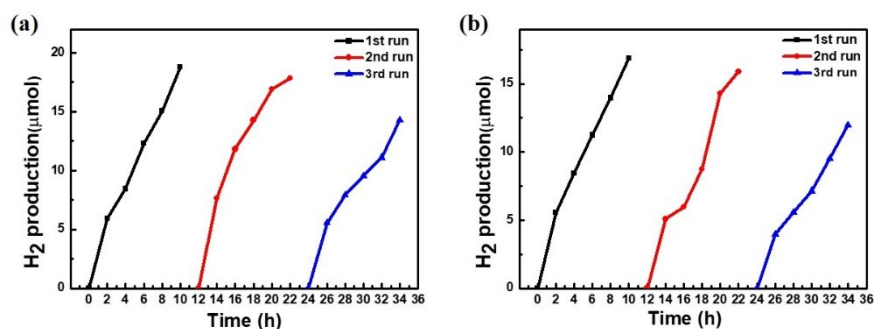

**Fig. S8.** Photocatalytic of **1** (a) and **2** (b) of the first run, second run and third run. Conditions: LED light (450 nm),  $[\text{Ir}(\text{ppy})_2(\text{dtbbpy})][\text{PF}_6]$  (0.2 mM), 3mL  $\text{CH}_3\text{CN}/\text{DMF}$  (1/3),  $\text{H}_2\text{O}$  (2 M) deaerated with  $\text{Ar}/\text{CH}_4$  (4:1).

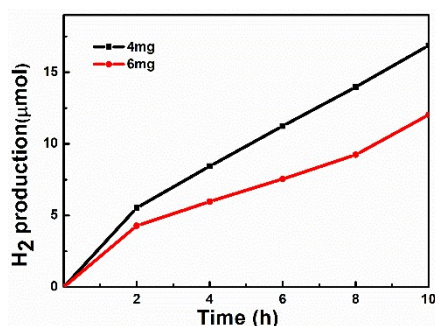

**Fig. S9.** Photocatalytic of **2** for 4 mg and 6 mg. Conditions: LED light (450 nm),  $[\text{Ir}(\text{ppy})_2(\text{dtbbpy})][\text{PF}_6]$  (0.2 mM), 3mL  $\text{CH}_3\text{CN}/\text{DMF}$  (1/3),  $\text{H}_2\text{O}$  (2 M) deaerated with  $\text{Ar}/\text{CH}_4$  (4:1).

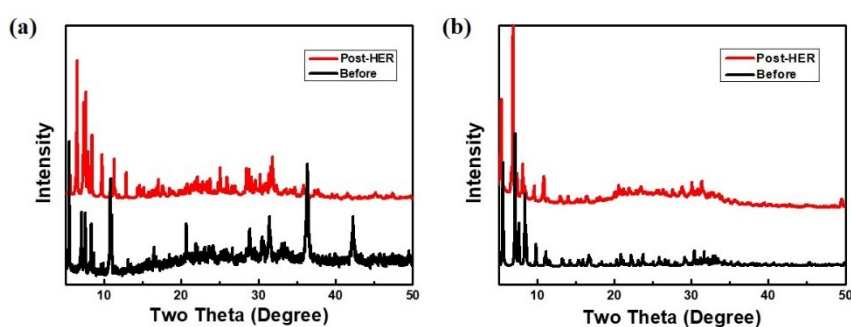

**Fig. S10.** The before and post-HER PXRD patterns of **1** (a) and **2** (b).
